# Supplementary material
Source: PubMed Central journal article supplement (PMC123128)
Supplement: supp_132051799_0517Table2.pdf [file supp_132051799_0517Table2.pdf]

**Table 2. Serine-threonine protein kinases selected for phylogenetic analysis**

| <b>Gene</b>                               | <b>Protein kinase</b>                  | <b>GenBank accession no.</b> |
|-------------------------------------------|----------------------------------------|------------------------------|
| <b><u>Akt/PKB kinases</u></b>             |                                        |                              |
| KRCB_HUMAN                                | <i>H. sapiens</i> Akt-2                | P31751                       |
| KRAC_HUMAN                                | <i>H. sapiens</i> c-Akt                | P31749                       |
| AAC62466                                  | <i>C. elegans</i> AKT-1 $\alpha$       | AAC62466                     |
| AAC62468                                  | <i>C. elegans</i> AKT-2                | AAC62468                     |
| CAA81204                                  | <i>D. melanogaster</i> Akt1            | CAA81204                     |
| <b><u>PKC kinases</u></b>                 |                                        |                              |
| Pprkca                                    | <i>H. sapiens</i> PKC $\alpha$         | 4506067                      |
| KPC1_HUMAN                                | <i>H. sapiens</i> PKC $\beta$ -1       | P05771                       |
| CAA78820                                  | <i>H. sapiens</i> PKC $\gamma$         | CAA78820                     |
| pPRKCD                                    | <i>H. sapiens</i> PKC $\delta$         | 5453970                      |
| PPRKCE                                    | <i>H. sapiens</i> PKC $\epsilon$       | 4885563                      |
| KPC2_CAEEL                                | <i>C. elegans</i> PKC1B                | P34885                       |
| KPC3_DROME                                | <i>D. melanogaster</i> PKC DPKC98F     | P13678                       |
| pPRKCZ                                    | <i>H. sapiens</i> PKC $\zeta$          | 4506079                      |
| <b><u>SGK kinases</u></b>                 |                                        |                              |
| YPK1_YEAST                                | <i>S. cerevisiae</i> YPK1              | P12688                       |
| YPK2_YEAST                                | <i>S. cerevisiae</i> YPK2              | P18961                       |
| SCH9_YEAST                                | <i>S. pombe</i> SCH9                   | P11792                       |
| PK2_DICDI                                 | <i>D. discoideum</i> protein kinase 2  | P28178                       |
| KRAC_DICDI                                | <i>D. discoideum</i> RAC-family kinase | P54644                       |
| SGK_RAT                                   | <i>R. norvegicus</i> SGK kinase        | Q06226                       |
| CAB03485                                  | <i>C. elegans</i> SGK-like kinase      | CAB03485                     |
| <b><u>cGMP-dependent kinases</u></b>      |                                        |                              |
| KGPB_HUMAN                                | <i>H. sapiens</i> CGK- $\beta$         | P14619                       |
| KGP2_DROME                                | <i>D. melanogaster</i> T1/T3 CGK       | Q03043                       |
| KGP1_DROME                                | <i>D. melanogaster</i> CGK-1           | Q03042                       |
| AAA83503                                  | <i>C. elegans</i> CGK                  | AAA83503                     |
| <b><u>cAMP-dependent kinases</u></b>      |                                        |                              |
| KAPA_YEAST                                | <i>S. cerevisiae</i> PKA               | P06244                       |
| KAPC_YEAST                                | <i>S. cerevisiae</i> PKA3              | P05986                       |
| KAPB_YEAST                                | <i>S. cerevisiae</i> PKA2              | P06245                       |
| KAPB_SCHPO                                | <i>S. pombe</i> PKA                    | P40376                       |
| KAPC_CAEEL                                | <i>C. elegans</i> PKA                  | P21137                       |
| KAPB_HUMAN                                | <i>H. sapiens</i> PKA C- $\beta$       | P22694                       |
| KAPA_HUMAN                                | <i>H. sapiens</i> PKA C- $\alpha$      | P17612                       |
| KAPC_DROME                                | <i>D. melanogaster</i> DC0             | P12370                       |
| KAPG_HUMAN                                | <i>H. sapiens</i> PKA C- $\gamma$      | P22612                       |
| S41099                                    | <i>B. emersonii</i> PKA                | S41099                       |
| <b><u>PRKX cAMP-dependent kinases</u></b> |                                        |                              |
| KAPC_ASCU                                 | <i>A. suum</i> PKA-C                   | P49673                       |
| CAB41352                                  | <i>C. elegans</i> cAMP- protein kinase | CAB41352                     |
| pPRKX                                     | <i>H. sapiens</i> PRKX protein kinase  | NP_005035                    |
| CAB57279                                  | <i>M. musculus</i> PRKX kinase         | CAB57279                     |
| KDC2_DROME                                | <i>D. melanogaster</i> DC2             | P16912                       |
| KAPC_DICDI                                | <i>D. discoideum</i> PKA-C             | P34099                       |
